# Supplementary material for: Effect of voicing and articulation manner on aerosol particle emission during human speech
Source: PubMed Central journal article supplement (PMC6984704; doi:10.1371/journal.pone.0227699), 2020-01-27
Supplement: pone.0227699.s001.pdf [file pone.0227699.s001.pdf]

**S1 Table. Details of phonetic analysis for Rainbow passage.** Blue and green columns show the number and fraction of each phoneme category in phrase, respectively.

| Phrase Number | Phrases                                           | Syllables Number | IPA Phonation                                   | Vowels | Voiced Plosives | Voiced Fricatives | Voicesless Plosives | Voiced Fricatives | Voicesless Fricatives | Nasals | Approx. | Trills |       |
|---------------|---------------------------------------------------|------------------|-------------------------------------------------|--------|-----------------|-------------------|---------------------|-------------------|-----------------------|--------|---------|--------|-------|
| 1             | When the sunlight strikes raindrops in the air,   | 10               | wen ðə 'sʌn,lait strəks 'reɪn,drɒps ɪn ði 'eɪr, | 13     | 0.382           | 1                 | 0.029               | 4                 | 0.118                 | 4      | 0.118   | 4      | 0.118 |
| 2             | they act as a prism and form a rainbow.           | 10               | ðeɪ ækt əz ə 'prɪzəm ænd fɔ:m ə 'reɪn,bəʊ.      | 14     | 0.467           | 1                 | 0.033               | 3                 | 0.1                   | 4      | 0.133   | 0      | 0     |
| 3             | The rainbow is a division of white                | 10               | ðə 'reɪn,bəʊ ɪz ə dɪ'vɪʒən əv waɪt              | 13     | 0.52            | 2                 | 0.08                | 1                 | 0.04                  | 2      | 0.08    | 1      | 0.04  |
| 4             | light into many beautiful colors.                 | 11               | laɪt ɪntu 'meni 'bjʊtəfəl 'kɔləz.               | 11     | 0.423           | 1                 | 0.038               | 4                 | 0.154                 | 1      | 0.038   | 3      | 0.115 |
| 5             | These take the shape of a long round arch,        | 9                | ði:z teɪk ðə 'ʃeɪp əv ə lɒŋ raʊnd ɑ:rtʃ.        | 12     | 0.429           | 1                 | 0.036               | 4                 | 0.143                 | 4      | 0.143   | 2      | 0.071 |
| 6             | with its path high above, and its two ends        | 10               | wɪð ɪts pæθ haɪ ə'bʌv, ænd ɪts tu endz          | 11     | 0.393           | 2                 | 0.071               | 4                 | 0.143                 | 4      | 0.143   | 2      | 0.071 |
| 7             | apparently beyond the horizon.                    | 10               | ə pərəntli bɪ'ɒnd ðə hə'raɪzən.                 | 11     | 0.458           | 2                 | 0.083               | 2                 | 0.083                 | 3      | 0.125   | 1      | 0.042 |
| 8             | There is, according to legend,                    | 8                | ðeɪnz, ə kɔ:drɪŋ tu 'legənd,                    | 8      | 0.381           | 3                 | 0.143               | 2                 | 0.095                 | 2      | 0.095   | 1      | 0.048 |
| 9             | a boiling pot of gold at one end.                 | 9                | ə 'bɔɪlɪŋ pɒt əv gəʊld æt wʌn end.              | 10     | 0.417           | 4                 | 0.167               | 3                 | 0.125                 | 3      | 0.125   | 3      | 0.125 |
| 10            | People look but no one ever finds it.             | 10               | 'pi:pl ə' lʊk,bʌt nəʊ wʌn 'evə fɑ:ndz ɪt.       | 12     | 0.414           | 3                 | 0.103               | 4                 | 0.138                 | 3      | 0.103   | 3      | 0.103 |
| 11            | When a man looks for something beyond             | 10               | wen ə mæn lʊks fɔ: 'sʌmθɪŋ bɪ'ɒnd               | 9      | 0.36            | 2                 | 0.08                | 1                 | 0.04                  | 0      | 0       | 4      | 0.16  |
| 12            | his reach, his friends say he is looking for      | 10               | hɪz ri:tʃ, hɪz frɛndz seɪ hi ɪz 'lʊkɪŋ fɔ:ɹ     | 11     | 0.355           | 1                 | 0.032               | 2                 | 0.065                 | 4      | 0.129   | 7      | 0.226 |
| 13            | the pot of gold at the end of the rainbow.        | 11               | ðə pɒt əv gəʊld æt ði end əv ðə 'reɪn,bəʊ.      | 14     | 0.467           | 4                 | 0.133               | 3                 | 0.1                   | 2      | 0.067   | 2      | 0.067 |
| 14            | Throughout the centuries people have              | 9                | θru: aʊt ðə 'senʃərɪz 'pi:pl həv                | 10     | 0.4             | 0                 | 0                   | 4                 | 0.16                  | 3      | 0.12    | 4      | 0.16  |
| 15            | explained the rainbow in various ways.            | 10               | ɪk'splɛnd ðə 'reɪn,bəʊ ɪn 'vərɪəs weɪz.         | 14     | 0.467           | 2                 | 0.067               | 3                 | 0.1                   | 2      | 0.067   | 3      | 0.1   |
| 16            | Some have accepted it as a miracle                | 10               | sʌm həv æk'septɪd ɪt əz ə 'mɪrəkl               | 10     | 0.4             | 1                 | 0.04                | 5                 | 0.2                   | 2      | 0.08    | 3      | 0.12  |
| 17            | without physical explanation.                     | 9                | wɪθaʊt 'fɪzɪkəl, ɪk'splə neɪʃən.                | 11     | 0.44            | 0                 | 0                   | 4                 | 0.16                  | 2      | 0.08    | 3      | 0.12  |
| 18            | To the Hebrews it was a token that                | 10               | tu ðə 'hi:briʊz ɪt wəz ə 'təʊkən ðæt            | 12     | 0.444           | 2                 | 0.074               | 5                 | 0.185                 | 4      | 0.148   | 1      | 0.037 |
| 19            | there would be no more universal floods.          | 10               | ðeɪ wəd bi: nəʊ mɔ: 'ju:nə vɜ:rsəl flʌdz.       | 10     | 0.357           | 3                 | 0.107               | 0                 | 0                     | 3      | 0.107   | 2      | 0.071 |
| 20            | The Greeks used to imagine that it was            | 10               | ðə gri:ks ɪzəd tu ɪ'mæɪdʒən ðæt ɪt wəz          | 10     | 0.357           | 3                 | 0.107               | 4                 | 0.143                 | 5      | 0.179   | 1      | 0.036 |
| 21            | a sign from the gods to foretell war              | 10               | ə saɪn frəm ðə gɒdz tu fɔ: 'tel wɔ:ɹ            | 10     | 0.385           | 2                 | 0.077               | 2                 | 0.077                 | 3      | 0.115   | 2      | 0.077 |
| 22            | or heavy rain. The Norsemen considered            | 11               | ɔ:ɹ 'hevi reɪn. ðə 'nɔ:smɛn kən'sɪdəd           | 11     | 0.393           | 2                 | 0.071               | 2                 | 0.071                 | 2      | 0.071   | 5      | 0.179 |
| 23            | the rainbow as a bridge over which the gods       | 10               | ðə 'reɪn,bəʊ əz ə brɪdʒ əvəv wɪf ðə gɒdz        | 14     | 0.438           | 5                 | 0.156               | 1                 | 0.031                 | 6      | 0.188   | 1      | 0.031 |
| 24            | passed from earth to their home in the sky.       | 9                | pæst frəm ɜ:θ tu ðeɪr hoʊm ɪn ðə skaɪ.          | 11     | 0.393           | 1                 | 0.036               | 3                 | 0.107                 | 2      | 0.071   | 5      | 0.179 |
| 25            | Others have tried to explain the                  | 8                | 'lðə:z həv traɪd tu ɪk'splɛn ðə                 | 10     | 0.4             | 1                 | 0.04                | 4                 | 0.16                  | 4      | 0.16    | 2      | 0.08  |
| 26            | phenomenon physically.                            | 8                | fə'nomə nən 'fɪzɪkəli.                          | 8      | 0.471           | 0                 | 0                   | 1                 | 0.059                 | 1      | 0.059   | 2      | 0.118 |
| 27            | Aristotle thought that the rainbow was caused     | 11               | 'erə stətl ðæt ðæt ðə 'reɪn,bəʊ wəz kɔ:zɪd      | 13     | 0.419           | 2                 | 0.065               | 5                 | 0.161                 | 4      | 0.129   | 2      | 0.065 |
| 28            | by reflection of the sun's rays by the rain.      | 11               | bɑ:ɹ ðə 'fɪkʃən, əv ðə saɪnz reɪz bɑ: ðə reɪn.  | 15     | 0.455           | 2                 | 0.061               | 1                 | 0.03                  | 5      | 0.152   | 3      | 0.091 |
| 29            | Since then physicists have found that it is not   | 11               | sɪns ðen 'fɪzɪsɪsts həv faʊnd ðæt ɪt ɪz nɒt     | 12     | 0.353           | 1                 | 0.029               | 4                 | 0.118                 | 5      | 0.147   | 8      | 0.235 |
| 30            | reflection, but refraction by the raindrops       | 11               | rɪ'fɪkʃən, bʌt, rɪ'frækʃən bɑ: ðə 'reɪn, drɒps  | 13     | 0.371           | 3                 | 0.086               | 4                 | 0.114                 | 1      | 0.029   | 5      | 0.143 |
| 31            | which causes the rainbows. Many complicated       | 10               | wɪf kɔ:zə ðə 'reɪn,bəʊz. 'meni 'kɒmplə,ketəd    | 15     | 0.429           | 2                 | 0.057               | 6                 | 0.171                 | 4      | 0.114   | 1      | 0.029 |
| 32            | ideas about the rainbow have been formed.         | 10               | aɪ'dɪəz ə'bəʊt ðə 'reɪn,bəʊ həv bi:n fɔ:ɹmɪd.   | 15     | 0.484           | 5                 | 0.161               | 1                 | 0.032                 | 3      | 0.097   | 2      | 0.065 |
| 33            | The difference in the rainbow depends             | 10               | ðə 'dɪfərəns ɪn ðə 'reɪn,bəʊ dɪ'pendz           | 11     | 0.407           | 4                 | 0.148               | 1                 | 0.037                 | 3      | 0.111   | 2      | 0.074 |
| 34            | considerably upon the size of                     | 10               | kən'sɪdərəbli ə'pɒn ðə saɪz əv                  | 11     | 0.458           | 2                 | 0.083               | 2                 | 0.083                 | 3      | 0.125   | 2      | 0.083 |
| 35            | the drops and the width of the colored band       | 10               | ðə drɒps, ænd ðə wɪð əv ðə 'kɔləd bænd          | 10     | 0.333           | 6                 | 0.2                 | 2                 | 0.067                 | 4      | 0.133   | 2      | 0.067 |
| 36            | increases as the size of the drops increases.     | 10               | ɪn 'krɪsɪz əz ðə saɪz əv ðə drɒps ɪn 'krɪsɪz.   | 13     | 0.394           | 1                 | 0.03                | 3                 | 0.091                 | 7      | 0.212   | 4      | 0.121 |
| 37            | The actual primary rainbow observed               | 10               | ði: 'æktʃuəl 'praɪ,məri 'reɪn,bəʊ əb'zəvɪd      | 14     | 0.452           | 3                 | 0.097               | 3                 | 0.097                 | 3      | 0.097   | 1      | 0.032 |
| 38            | is said to be the effect of super-                | 10               | ɪz seɪd tu bi: ði 'ɪfekt əv 'sʊpə               | 10     | 0.435           | 2                 | 0.087               | 4                 | 0.174                 | 3      | 0.13    | 3      | 0.13  |
| 39            | imposition of a number of bows.                   | 10               | ɪmpə'zɪʃən əv ə 'nʌmbər əv bəʊz.                | 11     | 0.458           | 2                 | 0.083               | 1                 | 0.042                 | 4      | 0.167   | 1      | 0.042 |
| 40            | If the red of The second bow falls upon           | 11               | ɪf ðə red əv ðə 'sekənd bəʊ fɛɪz ə'pɒn          | 12     | 0.429           | 3                 | 0.107               | 2                 | 0.071                 | 4      | 0.143   | 3      | 0.107 |
| 41            | the green of the first the result is to give      | 11               | ðə grɪn əv ðə fɜ:st, ðə rɪ'zʌlt ɪz tu gɪv       | 11     | 0.367           | 2                 | 0.067               | 3                 | 0.1                   | 7      | 0.233   | 2      | 0.067 |
| 42            | a bow with an abnormally wide yellow band,        | 12               | ə bəʊ wɪð ən əb'nɔ:ɹməli waɪd 'jeləʊ bænd,      | 15     | 0.484           | 5                 | 0.161               | 0                 | 0                     | 4      | 0.129   | 5      | 0.161 |
| 43            | since red and green light when mixed form yellow. | 10               | sɪns red ænd grɪn laɪtweɪn mɪkst fɔ:ɹm 'jeləʊ.  | 12     | 0.343           | 3                 | 0.086               | 3                 | 0.086                 | 0      | 0       | 4      | 0.114 |
| 44            | This is a very common type of bow.                | 10               | ðɪs ɪz ə 'veri kɒmən taɪp əv bəʊ.               | 12     | 0.5             | 1                 | 0.042               | 3                 | 0.125                 | 4      | 0.167   | 1      | 0.042 |
| 45            | one showing mainly red and yellow.                | 9                | wʌn 'ʃəʊɪŋ 'meɪnli red ænd 'jeləʊ.              | 12     | 0.48            | 2                 | 0.08                | 0                 | 0                     | 1      | 0.04    | 5      | 0.2   |
| 46            | with little or no green or blue.                  | 8                | wɪð 'lɪtl ɔ:ɹ,nəʊ grɪn ɔ:ɹ blɪu.                | 8      | 0               | 2                 | 0.095               | 1                 | 0.048                 | 0      | 0       | 2      | 0.095 |
