# Supplementary material for: Effect of voicing and articulation manner on aerosol particle emission during human speech
Source: PubMed Central journal article supplement (PMC6984704; doi:10.1371/journal.pone.0227699), 2020-01-27
Supplement: pone.0227699.s003.pdf [file pone.0227699.s003.pdf]

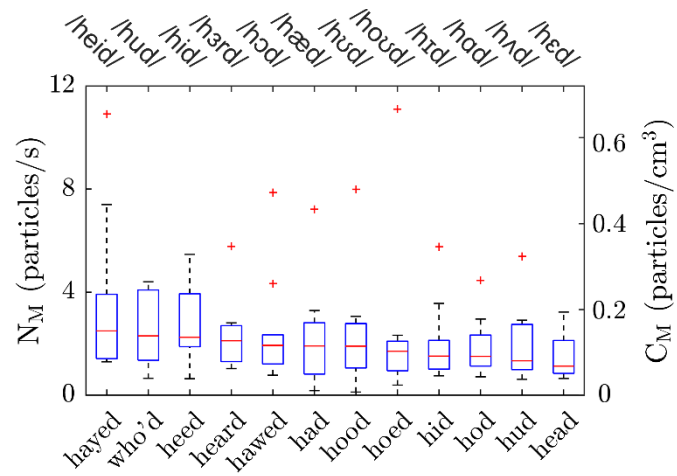

**S2 Fig. Particle emission rate/concentration of monosyllabic words.** Boxplot of particle emission rate ( $N_M$ )/concentration ( $C_M$ ) while repeating 12 monosyllabic words,  $N_M$ , (sample size  $n = 10$ ). Top x-axis shows the IPA notation of each word.
