# Supplementary material for: Effect of voicing and articulation manner on aerosol particle emission during human speech
Source: PubMed Central journal article supplement (PMC6984704; doi:10.1371/journal.pone.0227699), 2020-01-27
Supplement: pone.0227699.s004.pdf [file pone.0227699.s004.pdf]

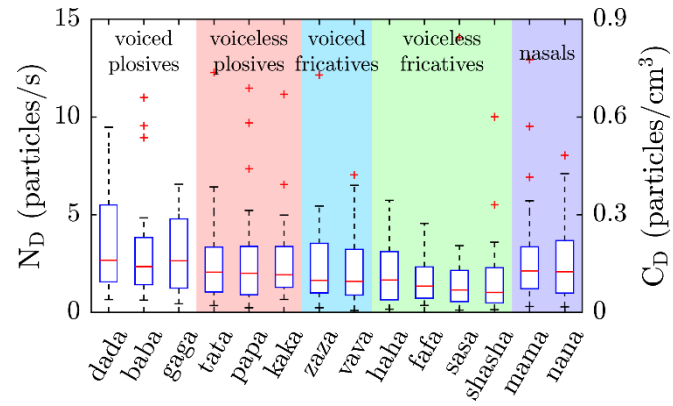

**S3 Fig. Particle emission rate/concentration of disyllabic words.** Boxplot of particle emission rate ( $N_D$ )/concentration ( $C_D$ ) while repeating 14 disyllabic words,  $N_D$ , (sample size  $n = 30$ ). Each background color represents the words including consonants which have similar voicing and articulation manner.
