# Supplementary material for: Effect of voicing and articulation manner on aerosol particle emission during human speech
Source: PubMed Central journal article supplement (PMC6984704; doi:10.1371/journal.pone.0227699), 2020-01-27
Supplement: pone.0227699.s005.pdf [file pone.0227699.s005.pdf]

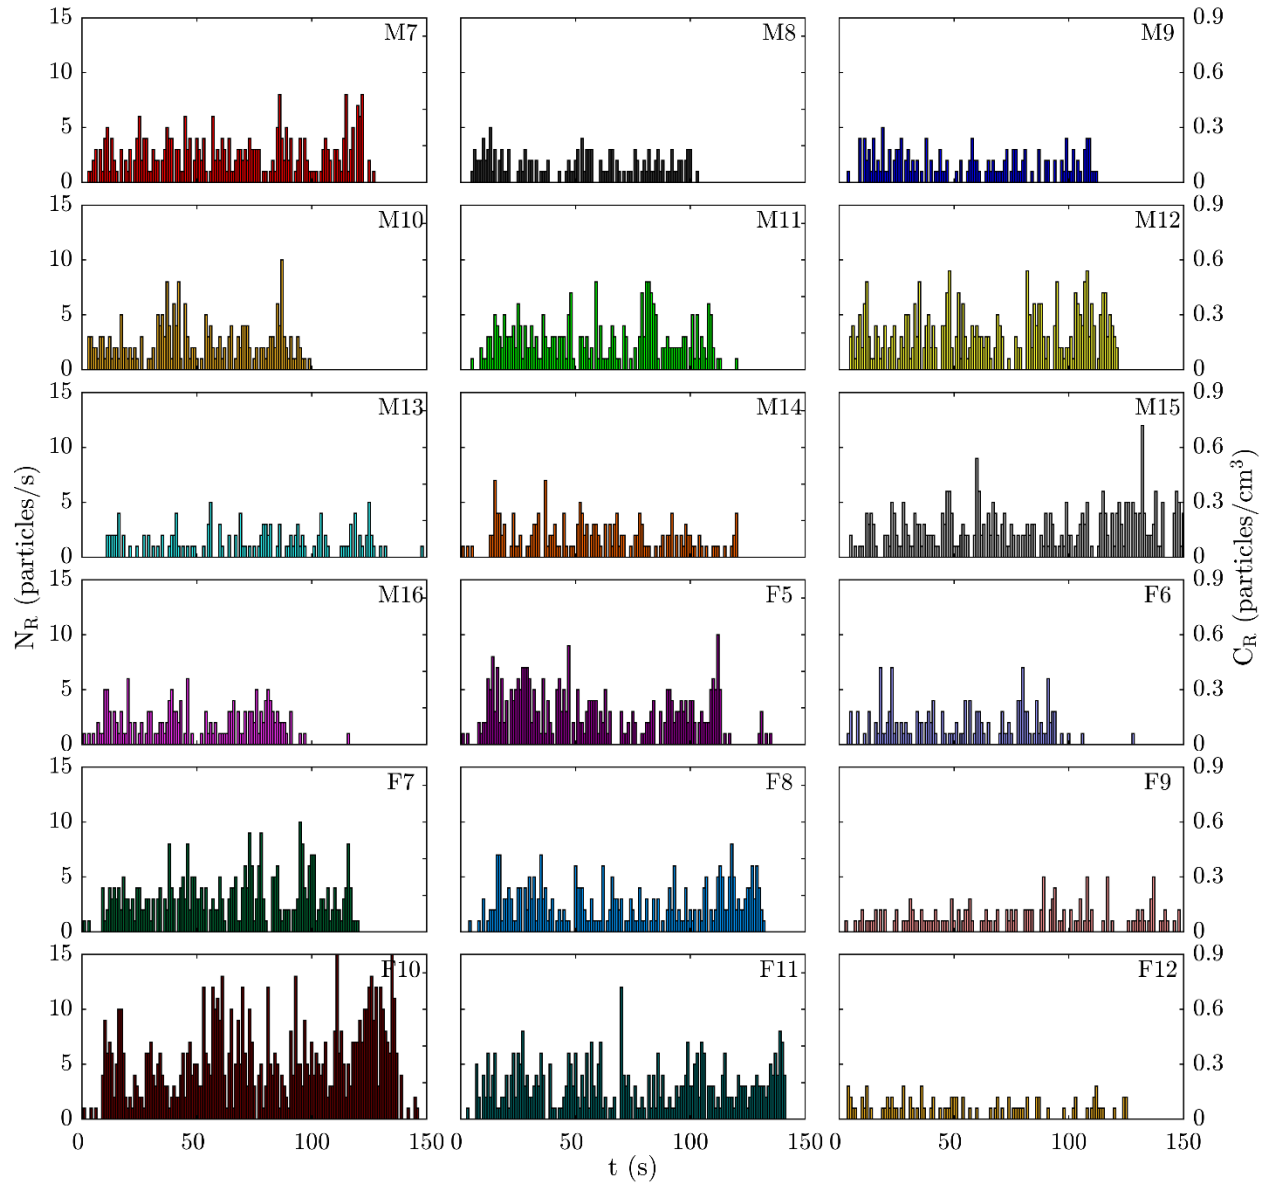

**S4 Fig. Particle emission rate/concentration for reading Rainbow passage.** Bar plots of particle emission rate/concentration versus time for reading Rainbow passage for 18 participants (10 males denoted as M7 to M16, and 8 females denoted as F5 to F12).
